# Supplementary material for: SHINE Transcription Factors Act Redundantly to Pattern the Archetypal Surface of Arabidopsis Flower Organs
Source: PLOS journal article supplement (doi:10.1371/journal.pgen.1001388), 2011-05-26
Supplement: S2 (10.1371/journal.pgen.1001388.s002) [file journal.pgen.1001388.s002]

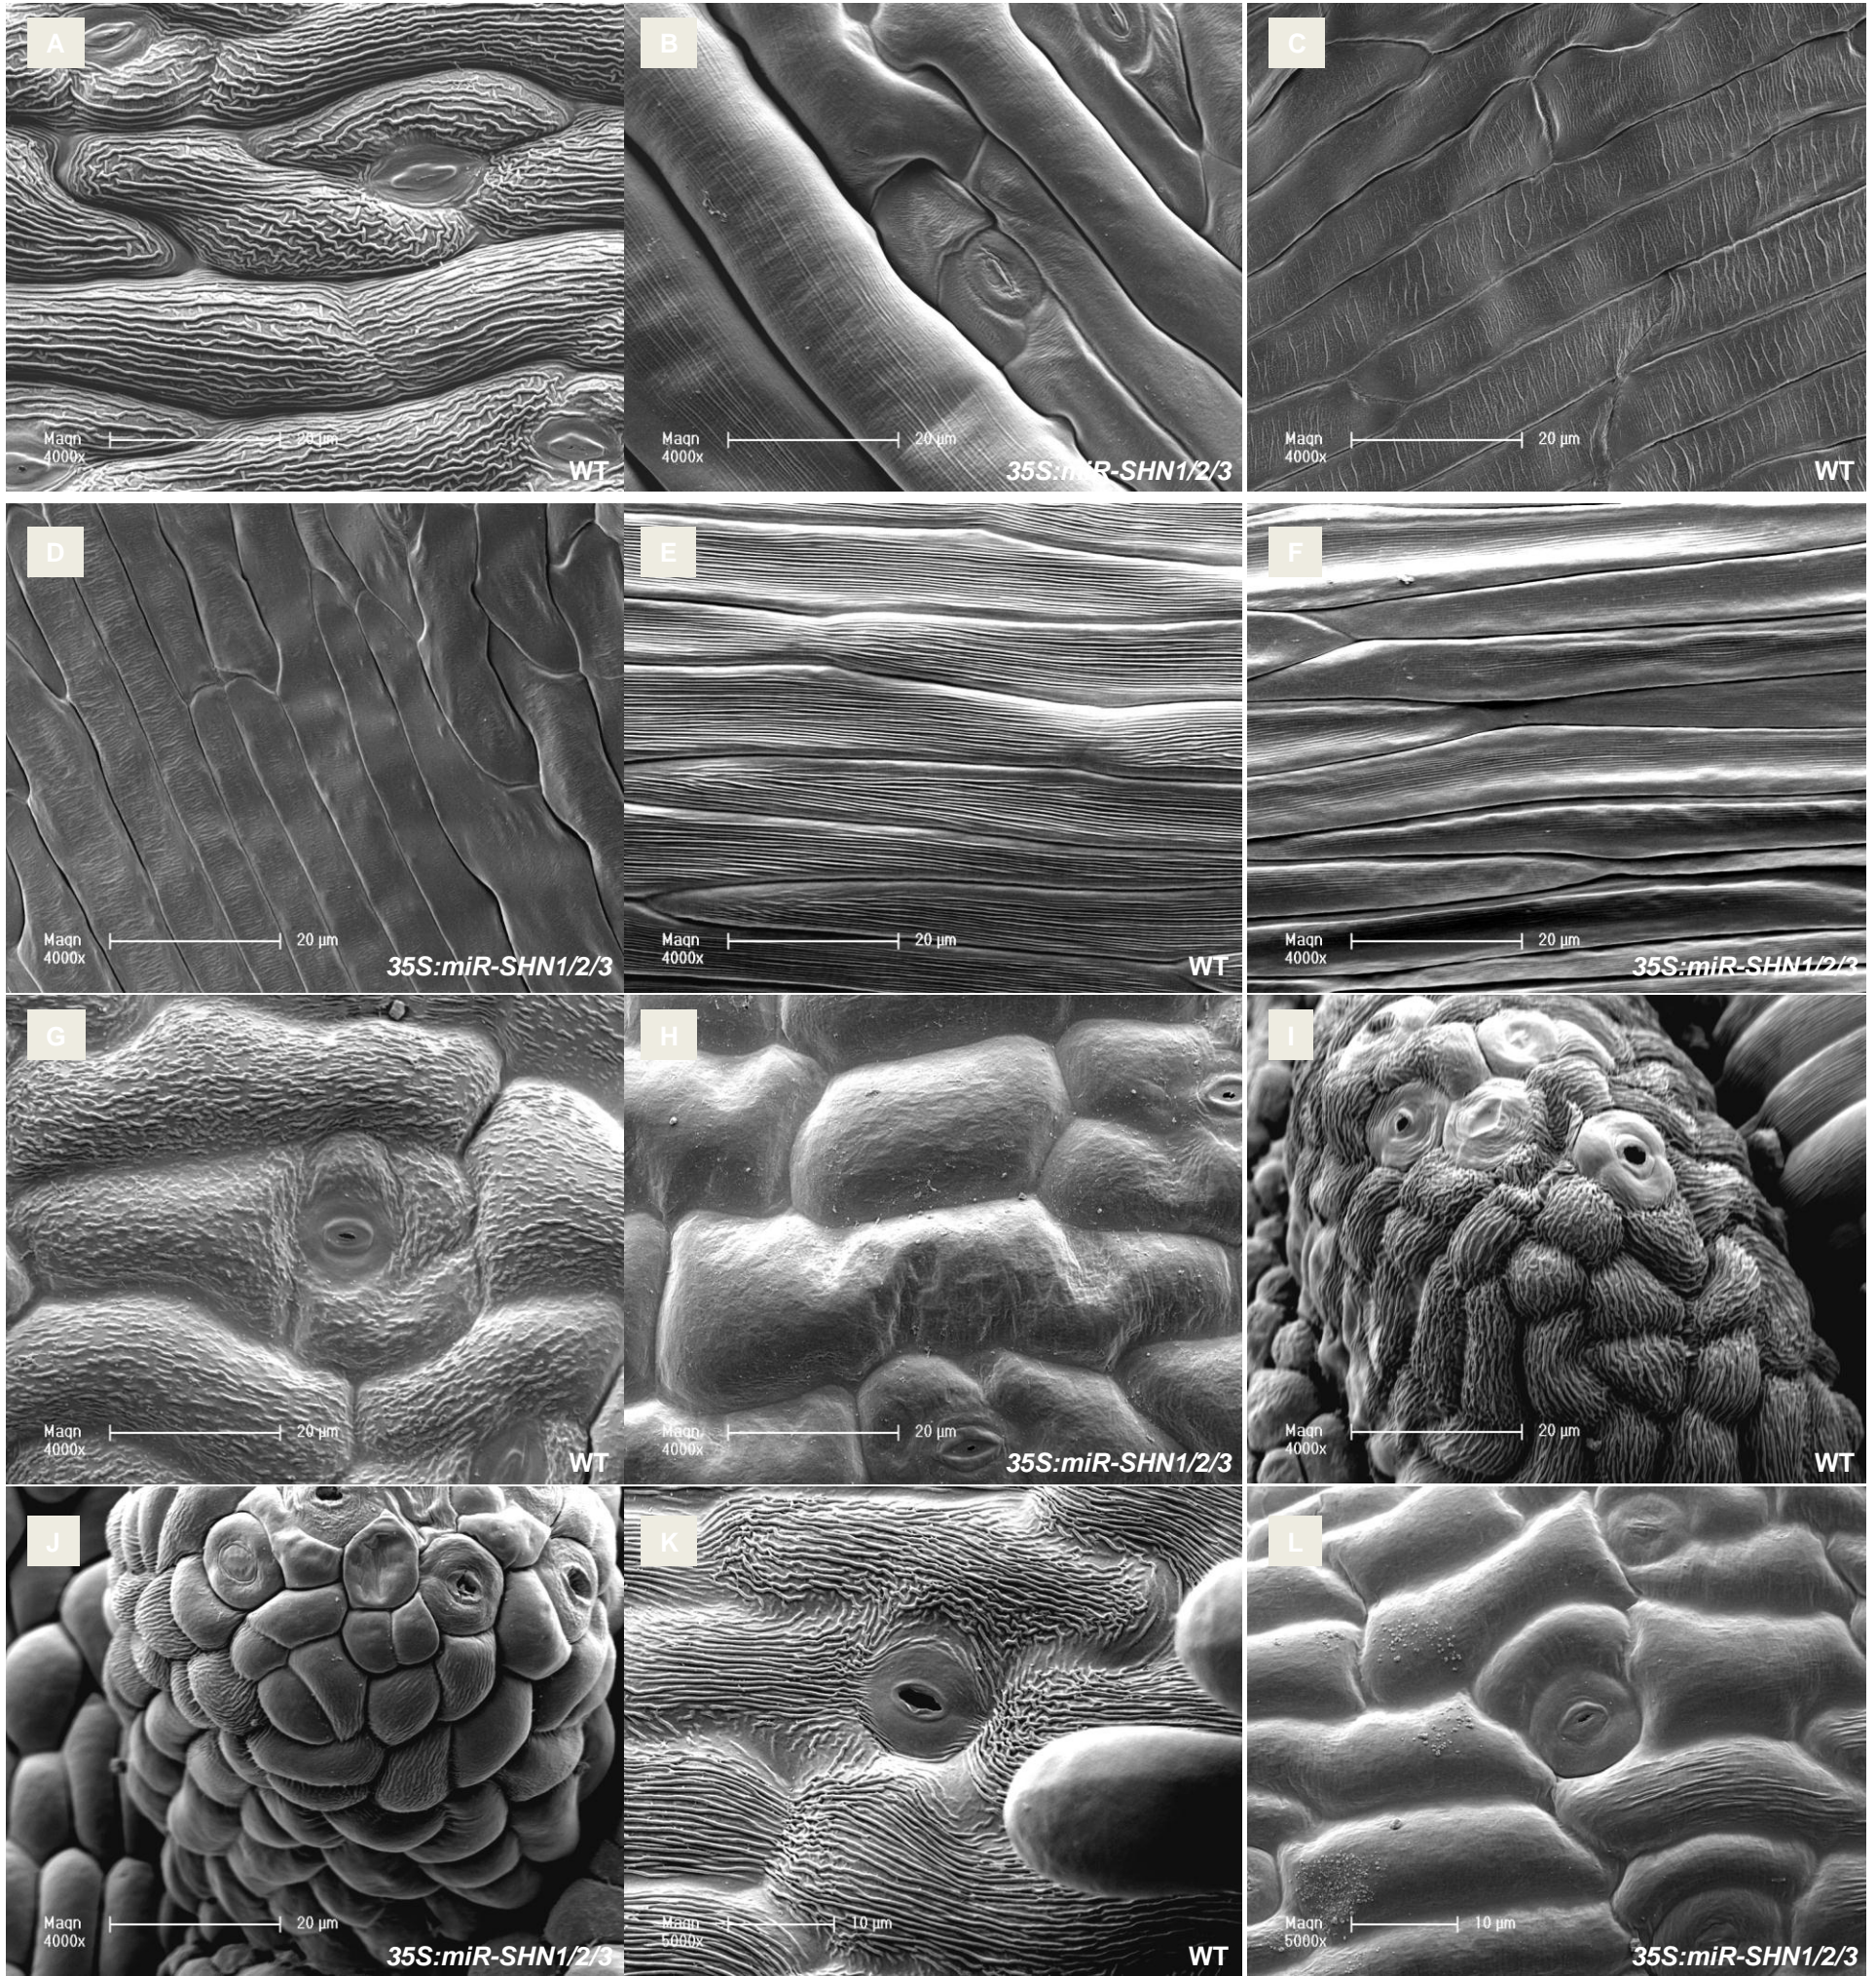

**Figure S2. Defective nanoridge phenotypes observed on the surfaces of floral organs other than petals in *35S:miR-SHN1/2/3* plants by SEM.** (A-B) Adaxial sepal surfaces. (C-D) Abaxial sepal surfaces. (E-F) Filament surfaces. (G-H) Pedicle surfaces. (I-J) Nectary surfaces. (K-L) Style surfaces. Note the disappearance or reduction of the deposition of nanoridges on the surfaces of those floral organs in *35S:miR-SHN1/2/3*.
