# Supplementary material for: SHINE Transcription Factors Act Redundantly to Pattern the Archetypal Surface of Arabidopsis Flower Organs
Source: PLOS journal article supplement (doi:10.1371/journal.pgen.1001388), 2011-05-26
Supplement: S3 (10.1371/journal.pgen.1001388.s003) [file journal.pgen.1001388.s003]

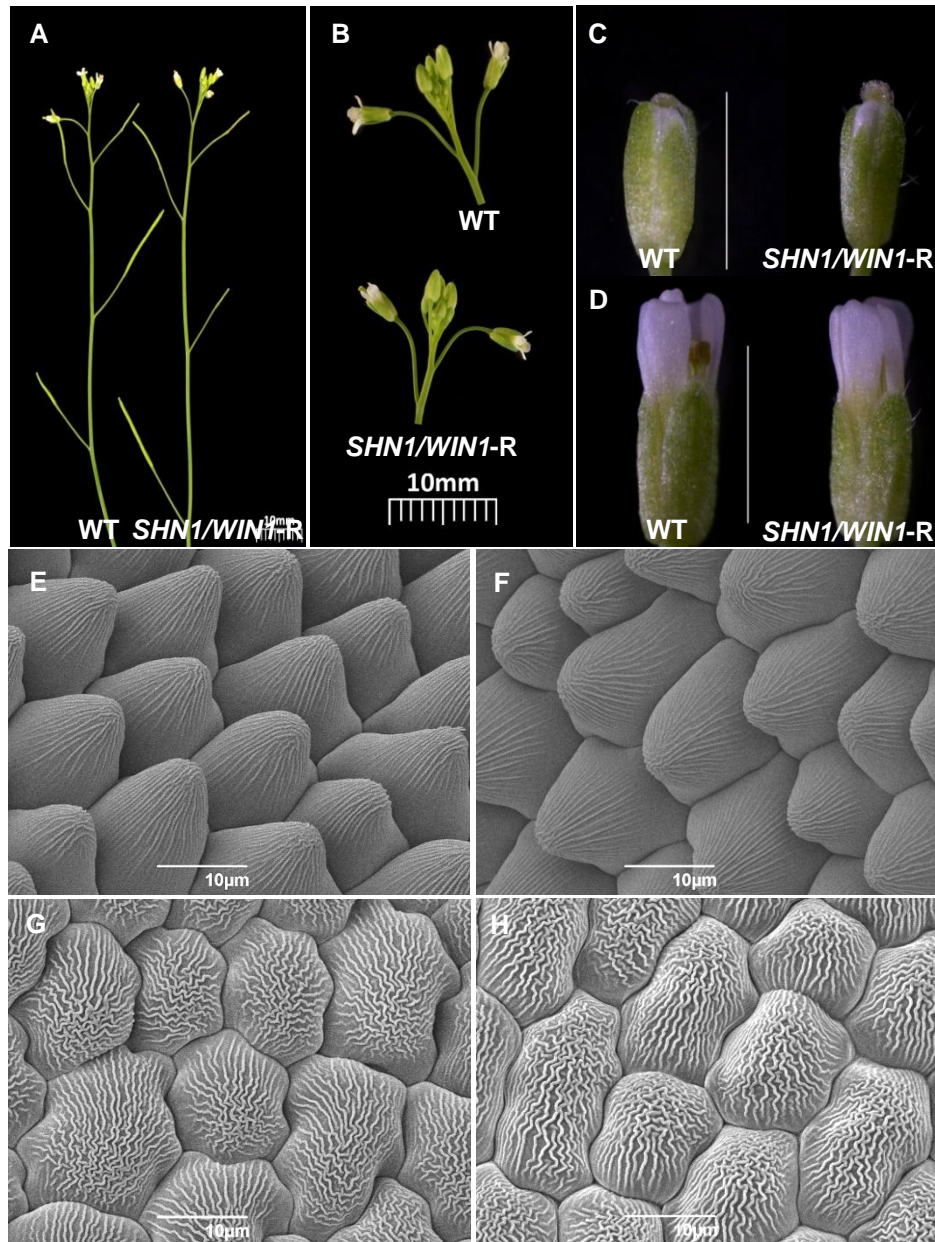

**Figure S3. *SHN1/WIN1* silencing does not affect floral organ morphology and surface characteristics.** (A) Inflorescence of *SHN1/WIN1* RNAi (*SHN1/WIN1* R) appears the same as that of WT. (B) A closer view shows no morphological difference between WT and *SHN1/WIN1* R line inflorescence. (C) Floral bud morphology in WT and *SHN1/WIN1* R line is similar. (D) Flowers of WT and *SHN1/WIN1* R line are similar. (E-F) SEM images of the adaxial petal surface display no changes in the patterning of the cuticular ridges between WT (E) and the *SHN1/WIN1* R plants (F). (G-H) SEM images of the abaxial petal indicate no changes in the patterning of the cuticular ridges in the *SHN1/WIN1* R plants (H) as compared with WT (G).
