# Supplementary material for: SHINE Transcription Factors Act Redundantly to Pattern the Archetypal Surface of Arabidopsis Flower Organs
Source: PLOS journal article supplement (doi:10.1371/journal.pgen.1001388), 2011-05-26
Supplement: S10 (10.1371/journal.pgen.1001388.s010) [file journal.pgen.1001388.s010]

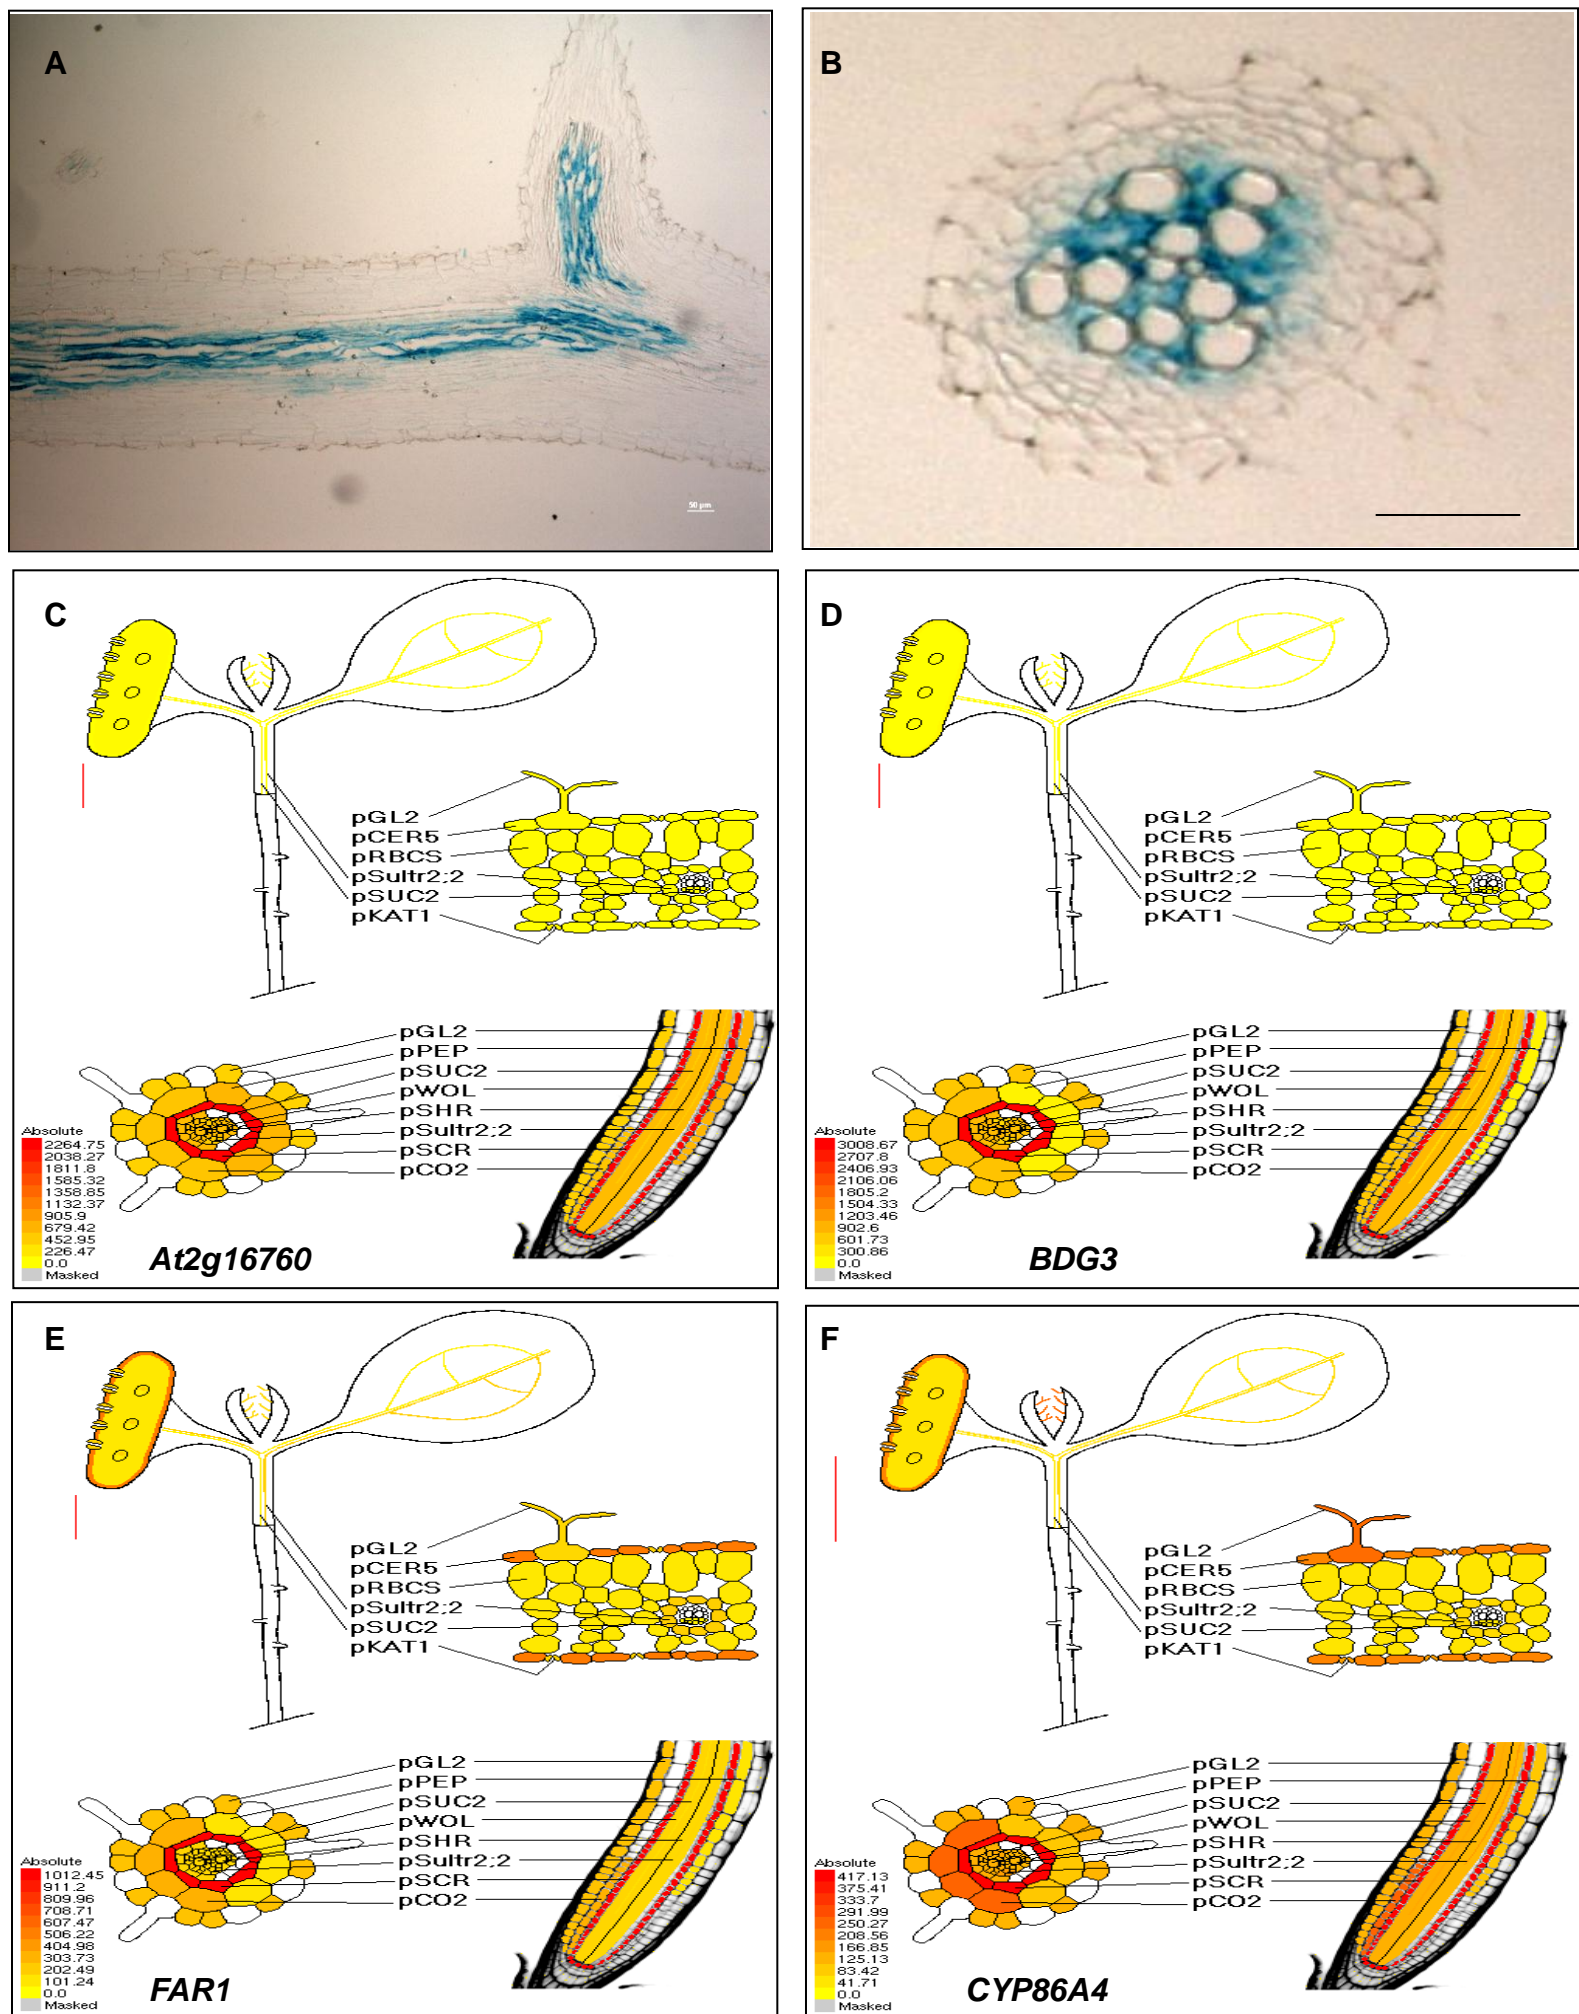

**Figure S10. Gus expression pattern of *SHN3* in the roots and mRNA levels of four *SHN* putative target genes in translomes of different cell populations of *Arabidopsis*.** (A) Gus staining of *SHN3* observed in the central cylinder of primary and lateral roots.(B) Cross section through a primary root (maturation zone) showing GUS staining of *SHN3* in the parenchymatic cells of the stele. (C-F) Absolute signal values of four putative *SHN* target gene transcripts in translomes isolated from cell populations visualized via the eFP platform (efp.ucr.edu/).
